# Supplementary material for: Extraction optimization, structural characterization and potential alleviation of hyperuricemia by flavone glycosides from celery seeds
Source: Royal Society of Chemistry journal article supplement (doi:10.1039/d2fo01715f), 2022-01-01

Fig. S5.  $^1\text{H-NMR}$  (600 MHz,  $\text{DMSO-d}_6$ ) and  $^{13}\text{C-NMR}$  (151 MHz,  $\text{DMSO-d}_6$ ) spectrum for **Graveobioside B**.

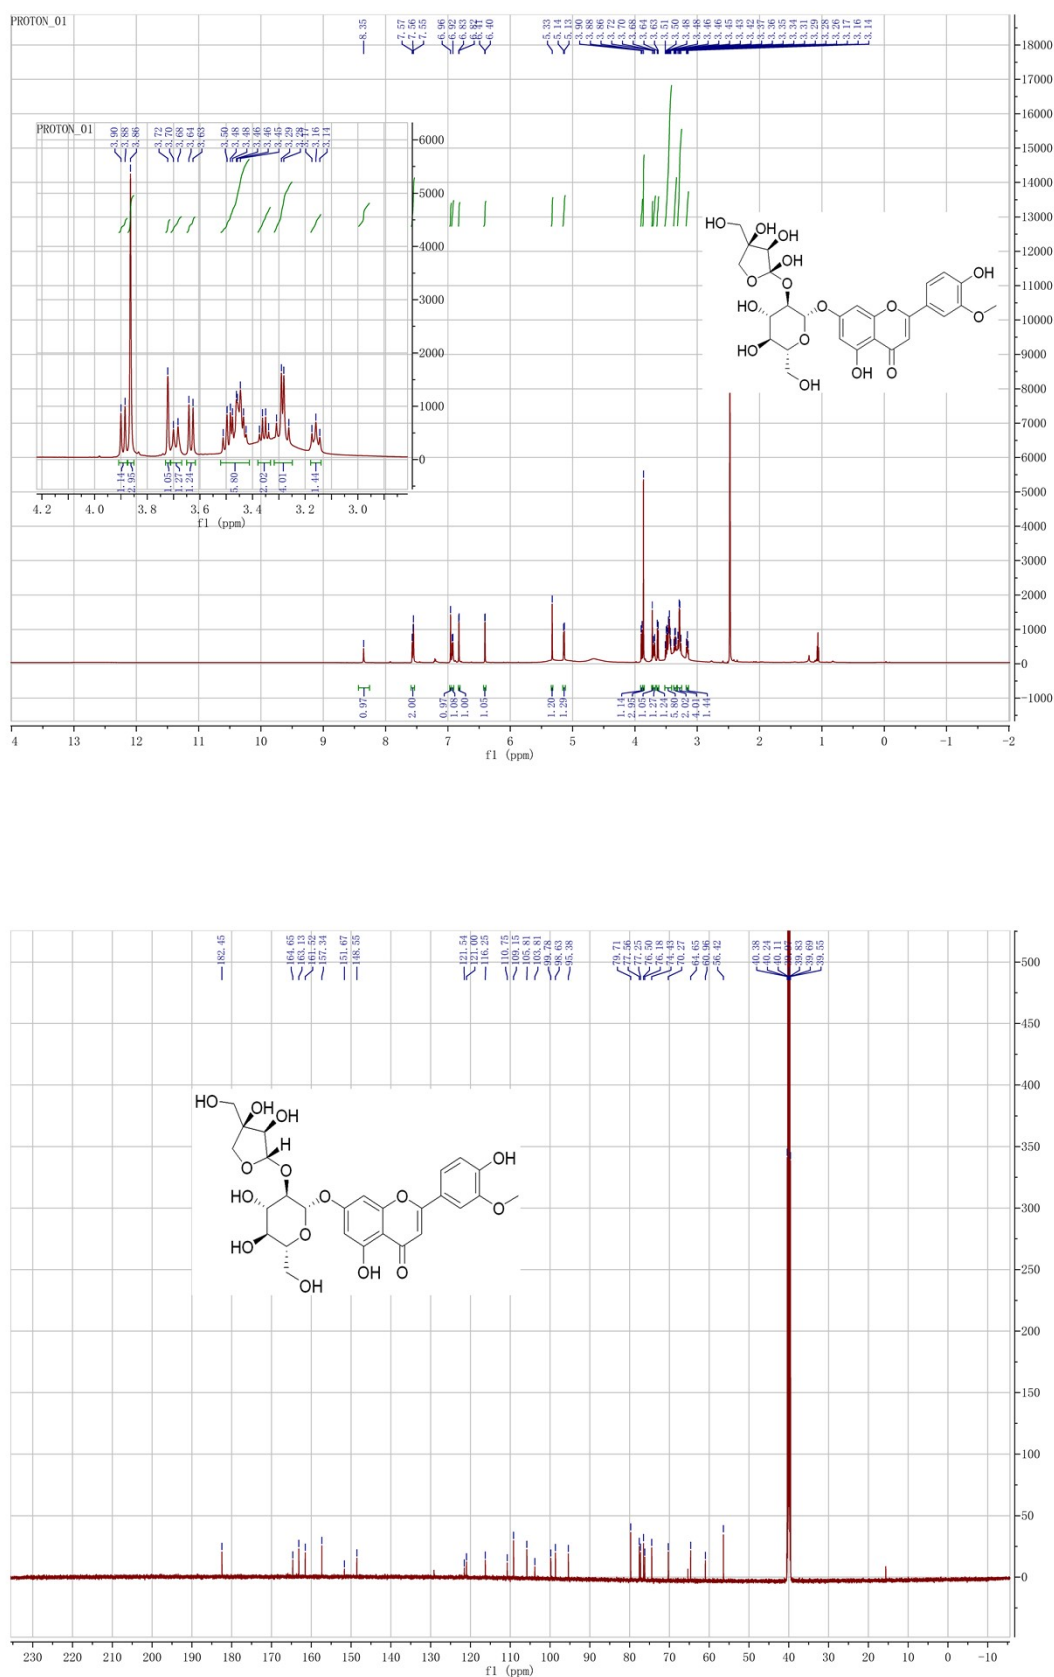

Fig. S6.  $^1\text{H-NMR}$  (600 MHz,  $\text{DMSO-d}_6$ ) and  $^{13}\text{C-NMR}$  (151 MHz,  $\text{DMSO-d}_6$ ) spectrum for **Chrysoeriol**.

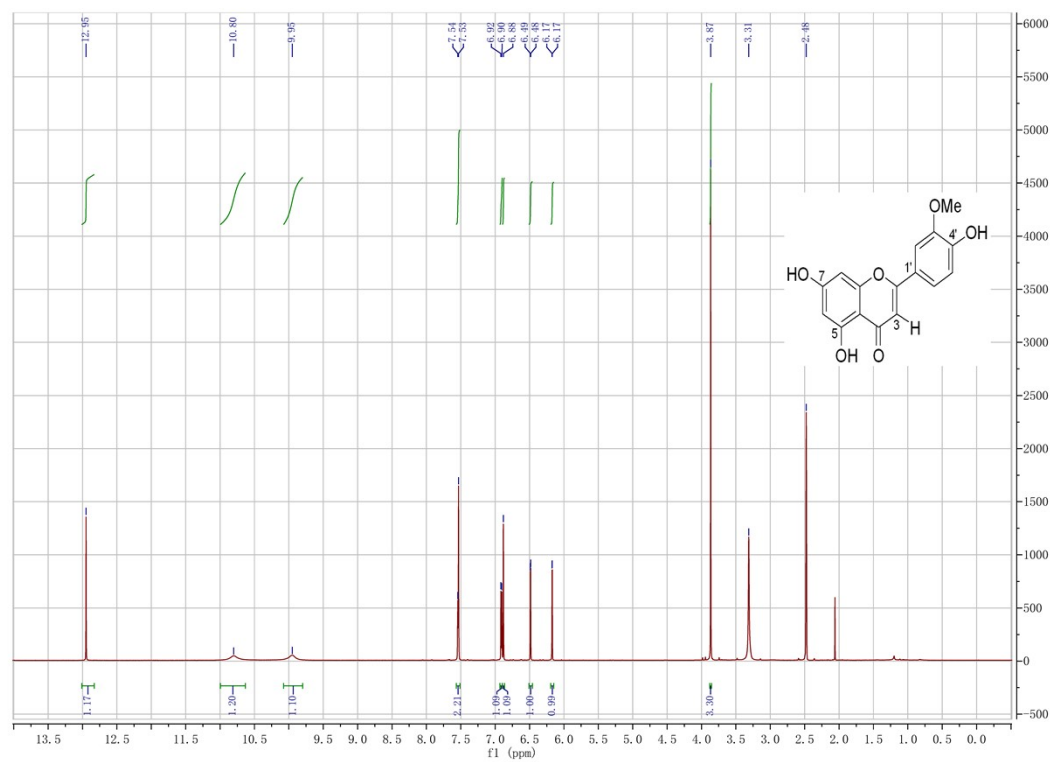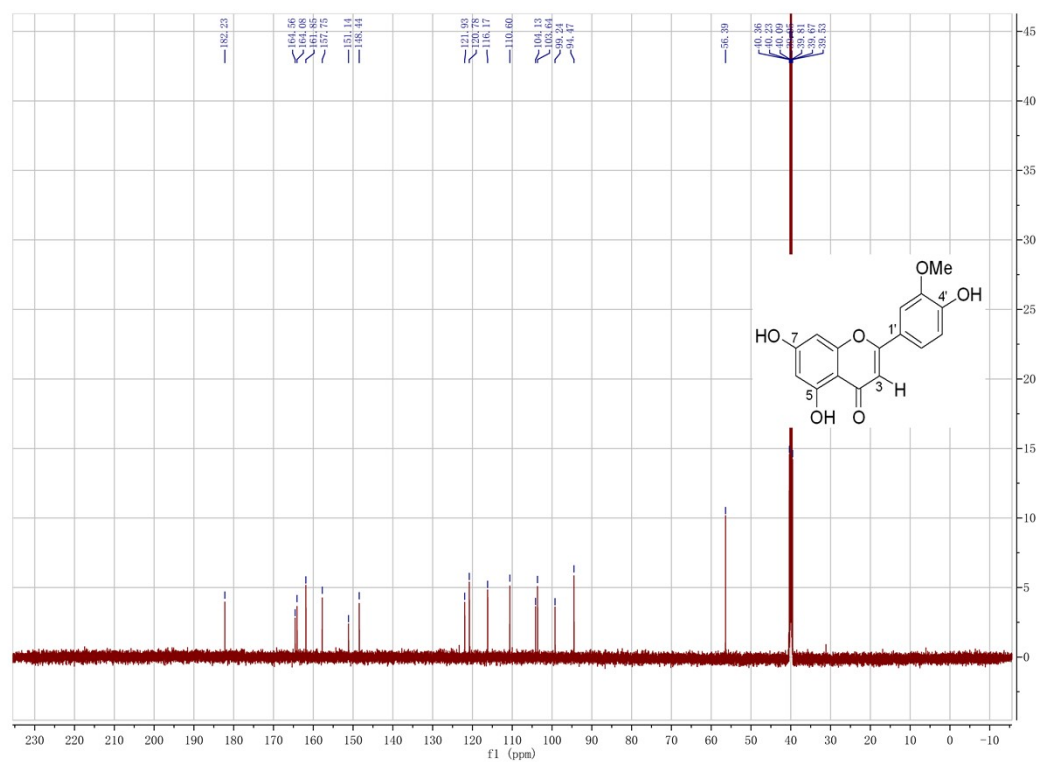

Supplement: d2fo01715f2.pdf [file d2fo01715f2.pdf]
