# Supplementary material for: Extraction optimization, structural characterization and potential alleviation of hyperuricemia by flavone glycosides from celery seeds
Source: Royal Society of Chemistry journal article supplement (doi:10.1039/d2fo01715f), 2022-01-01

Fig. S3.  $^1\text{H-NMR}$  (600 MHz,  $\text{DMSO-d}_6$ ) and  $^{13}\text{C-NMR}$  (151 MHz,  $\text{DMSO-d}_6$ ) spectrum for **Graveobioside A**.

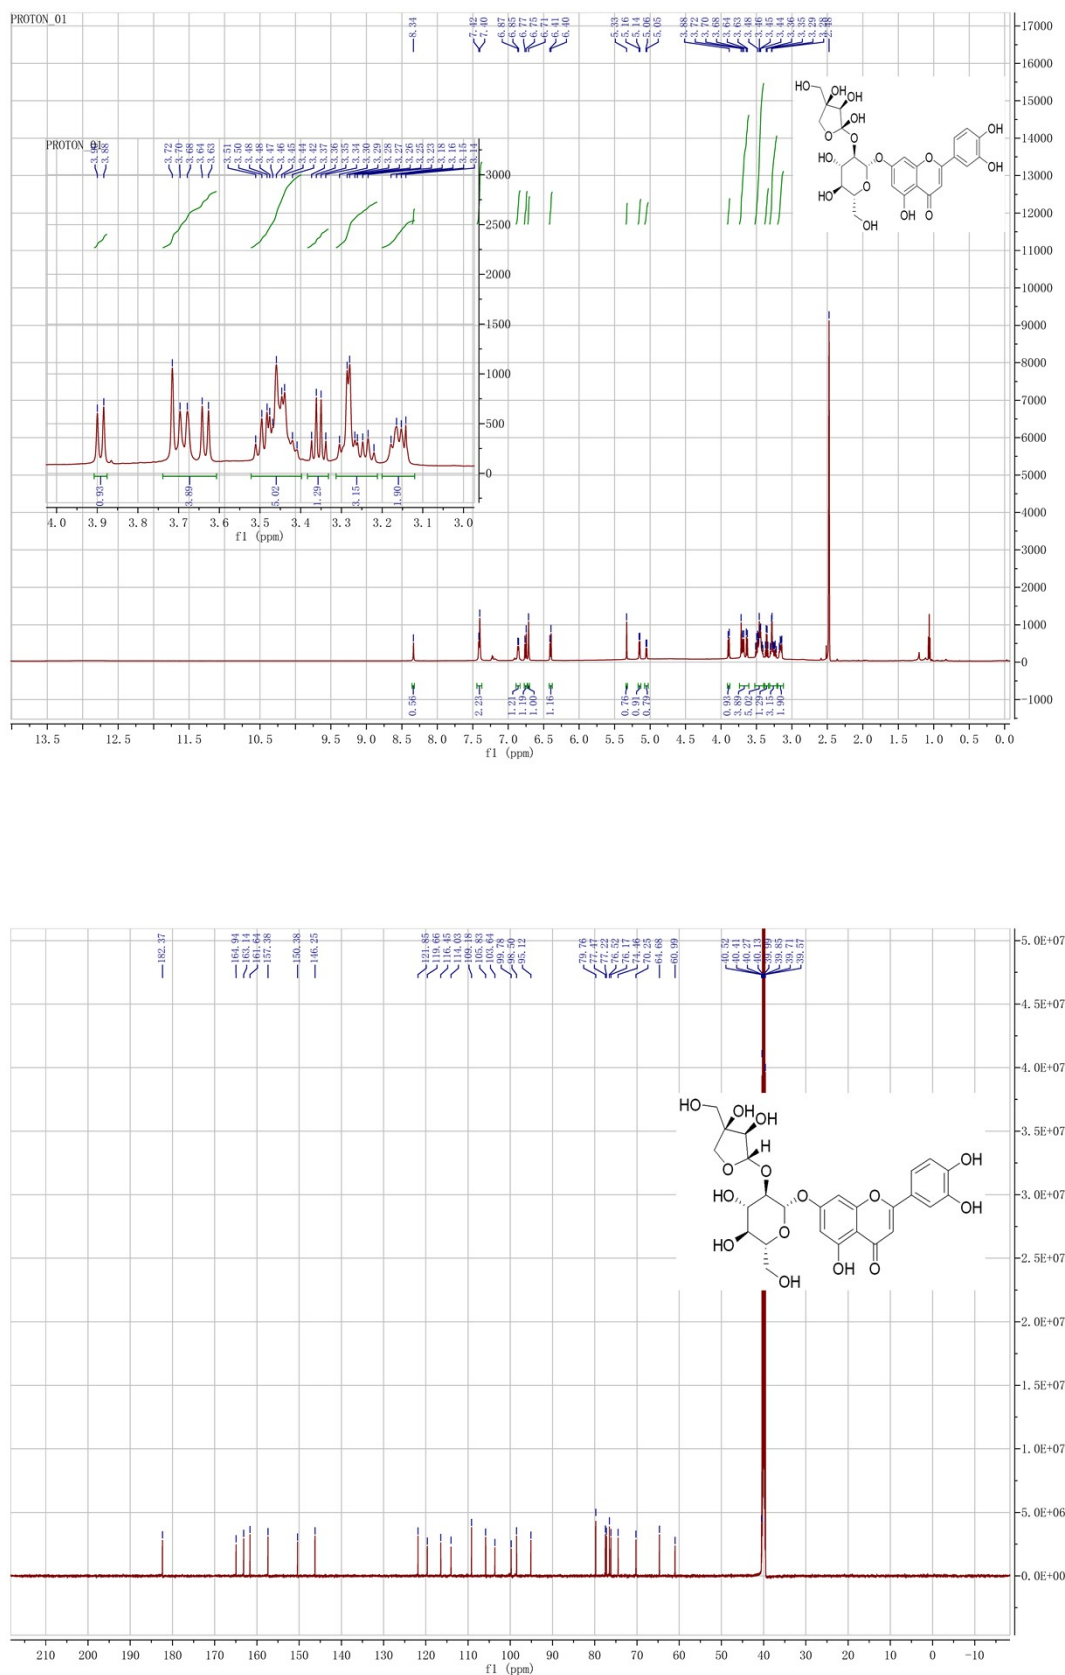

Fig. S4.  $^1\text{H}$ -NMR (600 MHz, DMSO- $d_6$ ) and  $^{13}\text{C}$ -NMR (151 MHz, DMSO- $d_6$ ) spectrum for **Luteolin**.

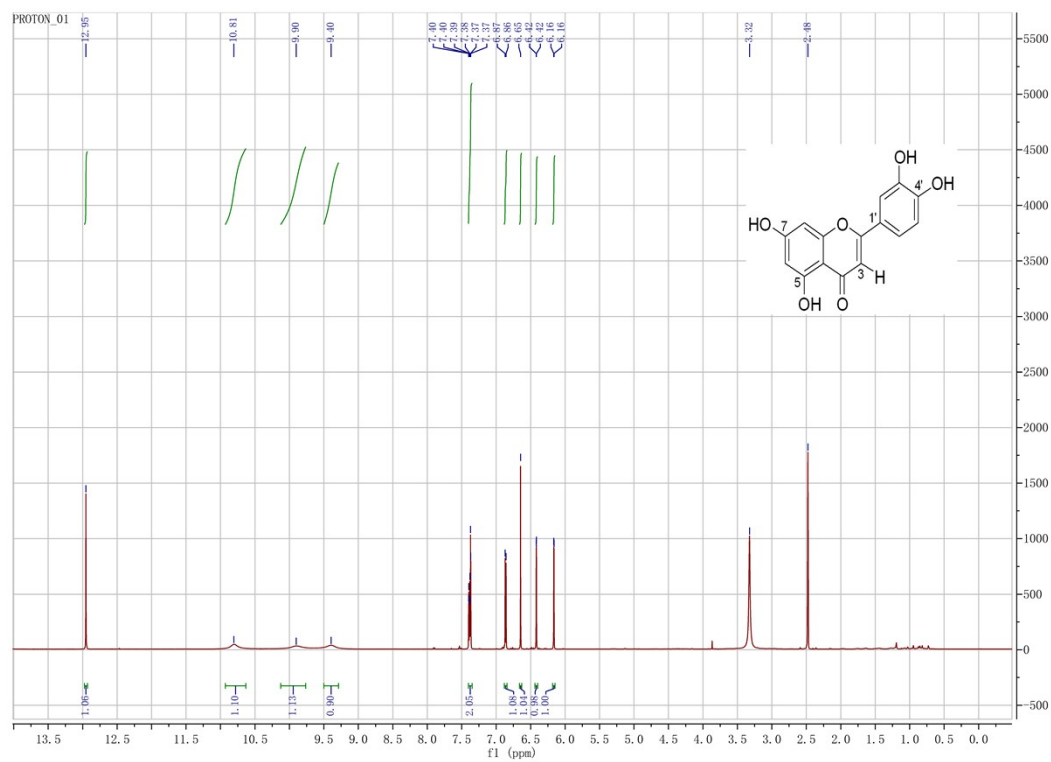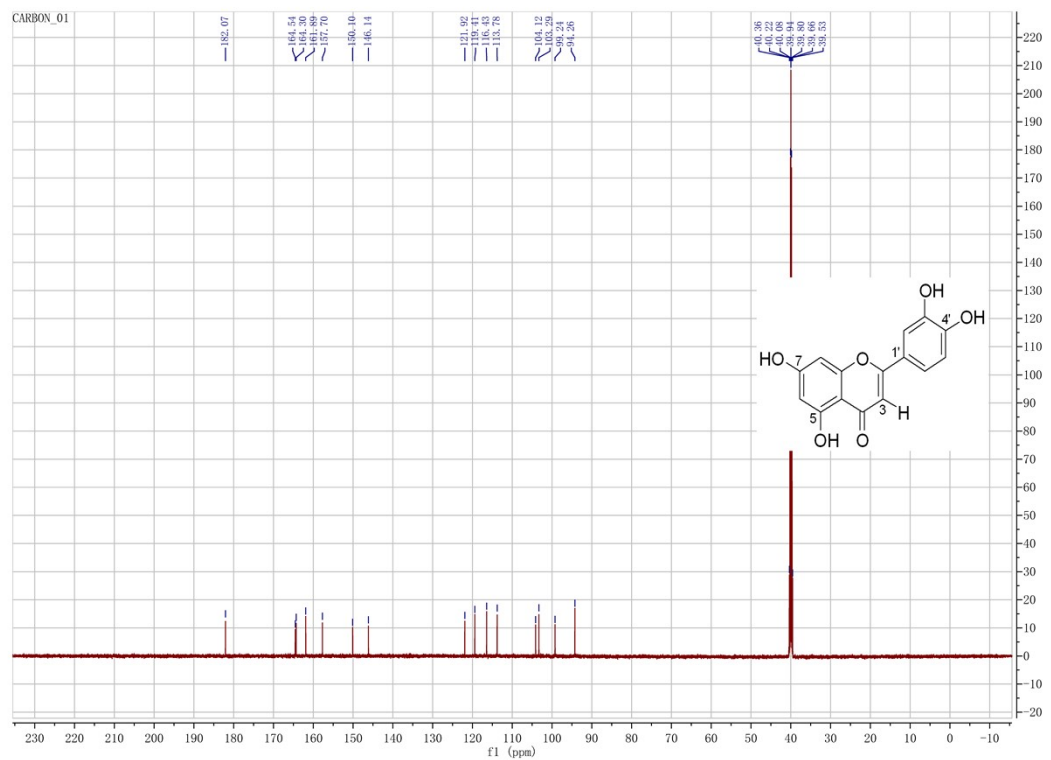

Supplement: d2fo01715f3.pdf [file d2fo01715f3.pdf]
