# Supplementary material for: Extraction optimization, structural characterization and potential alleviation of hyperuricemia by flavone glycosides from celery seeds
Source: Royal Society of Chemistry journal article supplement (doi:10.1039/d2fo01715f), 2022-01-01
Supplement: d2fo01715f4.pdf [file d2fo01715f4.pdf]

Fig. S7. The HPLC and MS spectra of the CSEA.

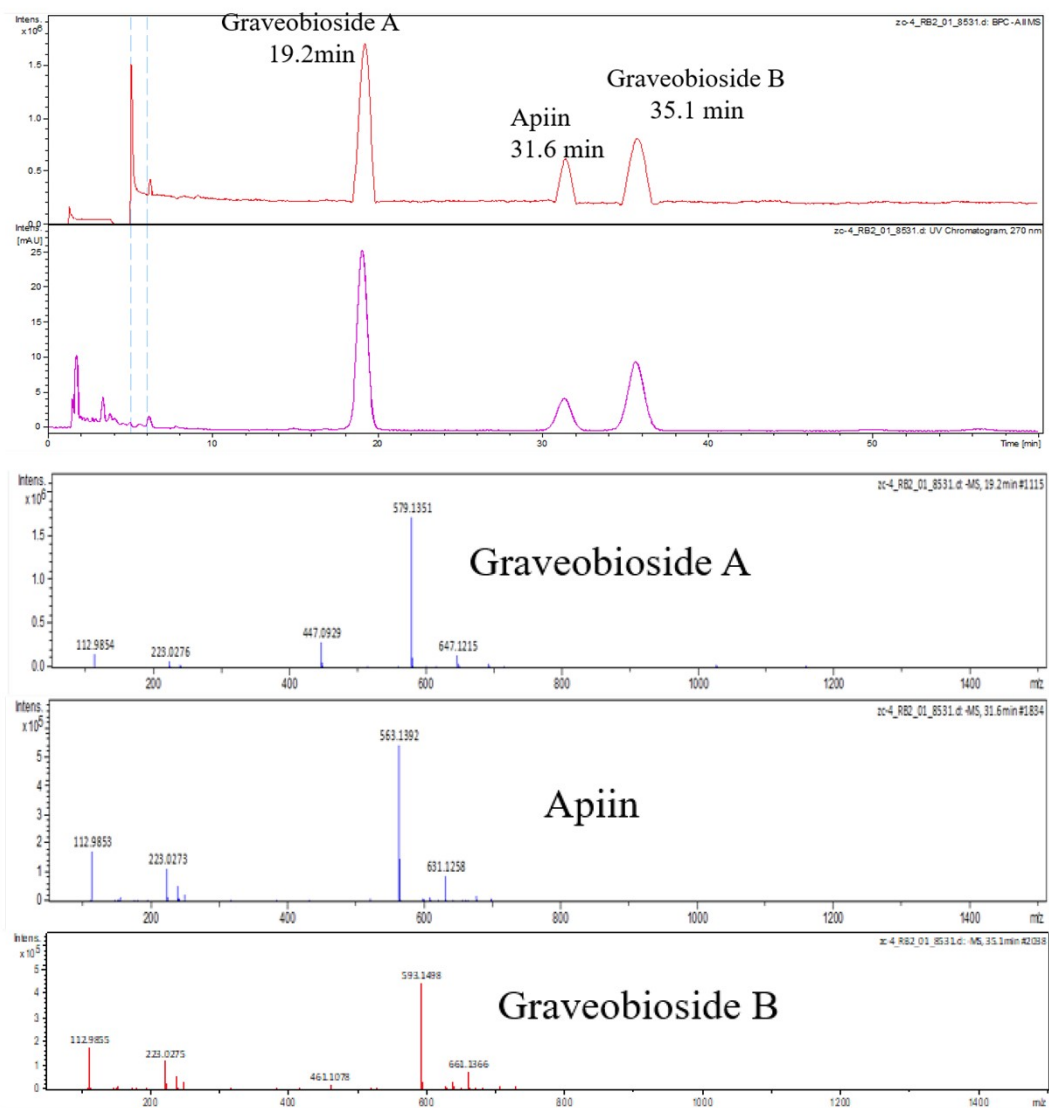

Fig. S8. Parts of the composition analysis <sup>a</sup>.

A. Anhydrous ethanol extracts (CSEA)

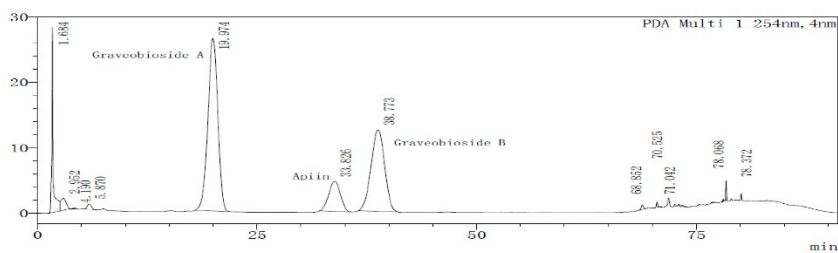

B. 60% ethanol extracts (CSEB)

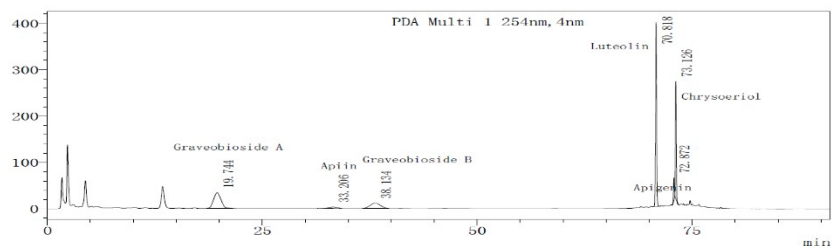

C. 40% ethanol extracts

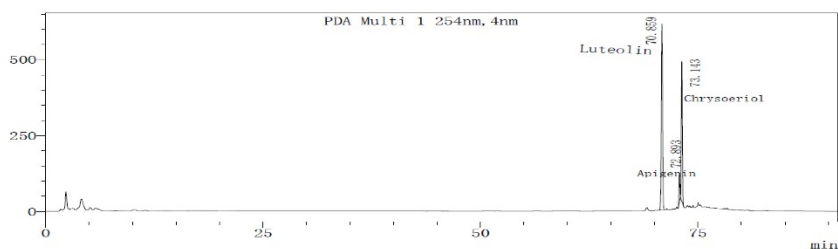

<sup>a</sup> The composition analysis by HPLC (SHIMADZU LC-20AT, Japan) with a Shimadzu C-18 (4.6\*150 mm, 5  $\mu$ m) column. Gradient separation using 0.1 % formic acid in water (v/v) (solvent A) and methanol (solvent B) as mobile phase was as follows: 0–60 min, 33 % B with isocratic elution; 60–75 min, linear gradient from 33 to 95% B; 75–80 min, 95 % B with isocratic elution; 80–90 min back to initial conditions at 33% B. The flow rate was 1.0 mL/min, the column temperature was 30  $^{\circ}$ C, and the injection volume was 10  $\mu$ L. Peaks were detected at 254 nm.
